# Supplementary material for: Unexpected E-stereoselective reductive A3-coupling reaction of terminal alkynes with aldehydes and amines
Source: Springer Nature journal article supplement (doi:10.1038/ncomms4884), 2014-05-22
Supplement: 41467_2014_BFncomms4884_MOESM27_ESM.mol [file 41467_2014_BFncomms4884_MOESM27_ESM.mol]

  ChemDraw04301409452D

 18 19  0  0  0  0  0  0  0  0999 V2000
   -0.3572    0.6020    0.0000 N   0  0  0  0  0  0  0  0  0  0  0  0
   -0.3572   -0.2259    0.0000 C   0  0  0  0  0  0  0  0  0  0  0  0
    0.3572   -0.6384    0.0000 C   0  0  0  0  0  0  0  0  0  0  0  0
    1.0717   -0.2259    0.0000 C   0  0  0  0  0  0  0  0  0  0  0  0
    0.3125    1.0886    0.0000 C   0  0  0  0  0  0  0  0  0  0  0  0
    0.0567    1.8759    0.0000 C   0  0  0  0  0  0  0  0  0  0  0  0
   -0.7712    1.8759    0.0000 C   0  0  0  0  0  0  0  0  0  0  0  0
   -1.0270    1.0886    0.0000 C   0  0  0  0  0  0  0  0  0  0  0  0
    1.7862   -0.6384    0.0000 C   0  0  0  0  0  0  0  0  0  0  0  0
    2.5006   -0.2259    0.0000 O   0  0  0  0  0  0  0  0  0  0  0  0
    1.3722   -1.3554    0.0000 C   0  0  0  0  0  0  0  0  0  0  0  0
    2.2001   -1.3554    0.0000 C   0  0  0  0  0  0  0  0  0  0  0  0
   -1.0717   -0.6384    0.0000 C   0  0  0  0  0  0  0  0  0  0  0  0
   -1.7862   -0.2259    0.0000 C   0  0  0  0  0  0  0  0  0  0  0  0
   -2.5006   -0.6384    0.0000 C   0  0  0  0  0  0  0  0  0  0  0  0
   -2.5006   -1.4634    0.0000 C   0  0  0  0  0  0  0  0  0  0  0  0
   -1.7862   -1.8759    0.0000 C   0  0  0  0  0  0  0  0  0  0  0  0
   -1.0717   -1.4634    0.0000 C   0  0  0  0  0  0  0  0  0  0  0  0
  2  1  1  6      
  2 13  1  0      
  2  3  1  0      
  3  4  2  0      
  1  5  1  0      
  5  6  2  0      
  6  7  1  0      
  7  8  2  0      
  8  1  1  0      
  4  9  1  0      
  9 10  1  0      
  9 11  1  0      
  9 12  1  0      
 13 14  1  0      
 14 15  1  0      
 15 16  1  0      
 16 17  1  0      
 17 18  1  0      
 13 18  1  0      
M  END
