# Supplementary material for: Unexpected E-stereoselective reductive A3-coupling reaction of terminal alkynes with aldehydes and amines
Source: Springer Nature journal article supplement (doi:10.1038/ncomms4884), 2014-05-22
Supplement: 41467_2014_BFncomms4884_MOESM29_ESM.mol [file 41467_2014_BFncomms4884_MOESM29_ESM.mol]

  ChemDraw04301409452D

 17 18  0  0  0  0  0  0  0  0999 V2000
   -0.7168    0.6020    0.0000 N   0  0  0  0  0  0  0  0  0  0  0  0
   -0.7168   -0.2258    0.0000 C   0  0  0  0  0  0  0  0  0  0  0  0
   -0.0024   -0.6383    0.0000 C   0  0  0  0  0  0  0  0  0  0  0  0
   -0.0471    1.0885    0.0000 C   0  0  0  0  0  0  0  0  0  0  0  0
   -0.3029    1.8758    0.0000 C   0  0  0  0  0  0  0  0  0  0  0  0
   -1.1307    1.8758    0.0000 C   0  0  0  0  0  0  0  0  0  0  0  0
   -1.3865    1.0885    0.0000 C   0  0  0  0  0  0  0  0  0  0  0  0
    0.7145   -0.2244    0.0000 C   0  0  0  0  0  0  0  0  0  0  0  0
    1.4314   -0.6383    0.0000 C   0  0  0  0  0  0  0  0  0  0  0  0
    2.1457   -0.2258    0.0000 O   0  0  0  0  0  0  0  0  0  0  0  0
   -1.4313   -0.6383    0.0000 C   0  0  0  0  0  0  0  0  0  0  0  0
   -2.1457   -0.2258    0.0000 C   0  0  0  0  0  0  0  0  0  0  0  0
   -2.8602   -0.6383    0.0000 C   0  0  0  0  0  0  0  0  0  0  0  0
   -2.8602   -1.4633    0.0000 C   0  0  0  0  0  0  0  0  0  0  0  0
   -2.1457   -1.8758    0.0000 C   0  0  0  0  0  0  0  0  0  0  0  0
   -1.4313   -1.4633    0.0000 C   0  0  0  0  0  0  0  0  0  0  0  0
    2.8602   -0.6383    0.0000 C   0  0  0  0  0  0  0  0  0  0  0  0
  1  2  1  0      
  2 11  1  0      
  2  3  1  0      
  1  4  1  0      
  4  5  2  0      
  5  6  1  0      
  6  7  2  0      
  7  1  1  0      
  3  8  2  0      
  8  9  1  0      
  9 10  1  0      
 11 12  1  0      
 12 13  1  0      
 13 14  1  0      
 14 15  1  0      
 15 16  1  0      
 11 16  1  0      
 10 17  1  0      
M  END
